# Supplementary material for: Tissue-Specific Sex Difference in Mouse Eye and Brain Metabolome Under Fed and Fasted States
Source: PubMed Central journal article supplement (PMC10010444; doi:10.1167/iovs.64.3.18), 2023-03-09
Supplement: iovs-64-3-18_s001.pdf [file iovs-64-3-18_s001.pdf]

## **Supporting Information**

### **Tissue-specific sex difference in mouse eye and brain metabolome under fed and fasted states**

Meghashri Saravanan\*, Rong Xu\*, Olivia Roby, Yekai Wang, Siyan Zhu, Amy Lu, and Jianhai Du<sup>&</sup>

This file includes:

Supplementary Figure S1-6

Supplementary Table S1-17

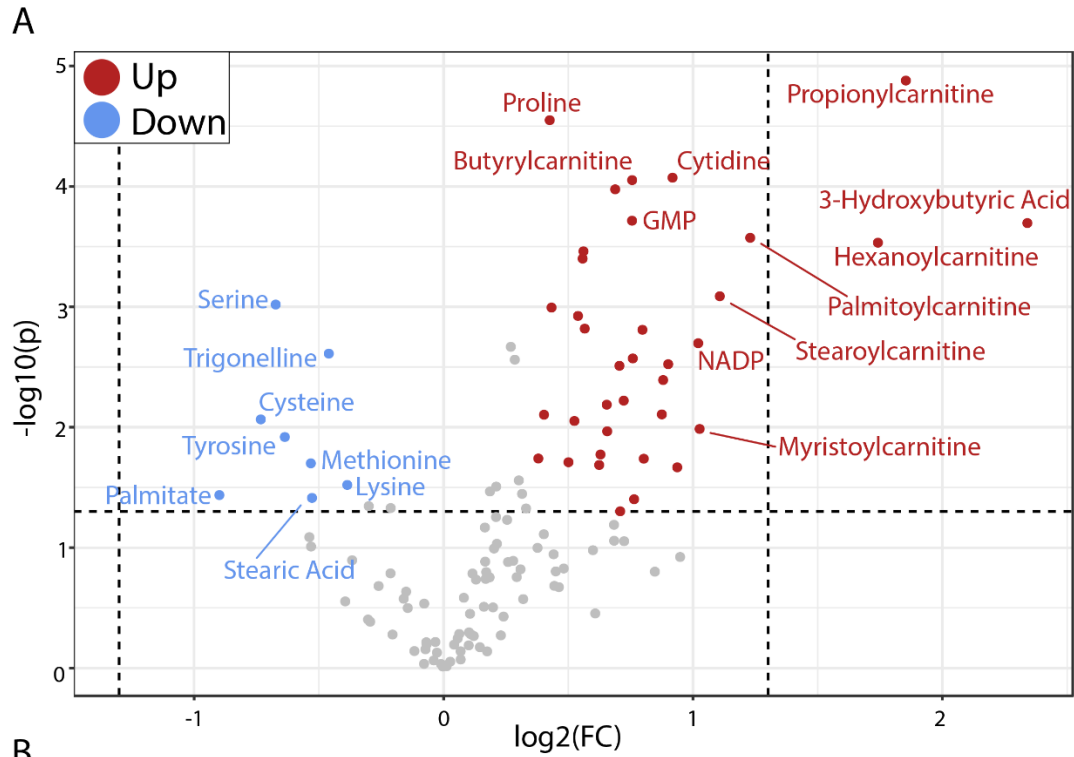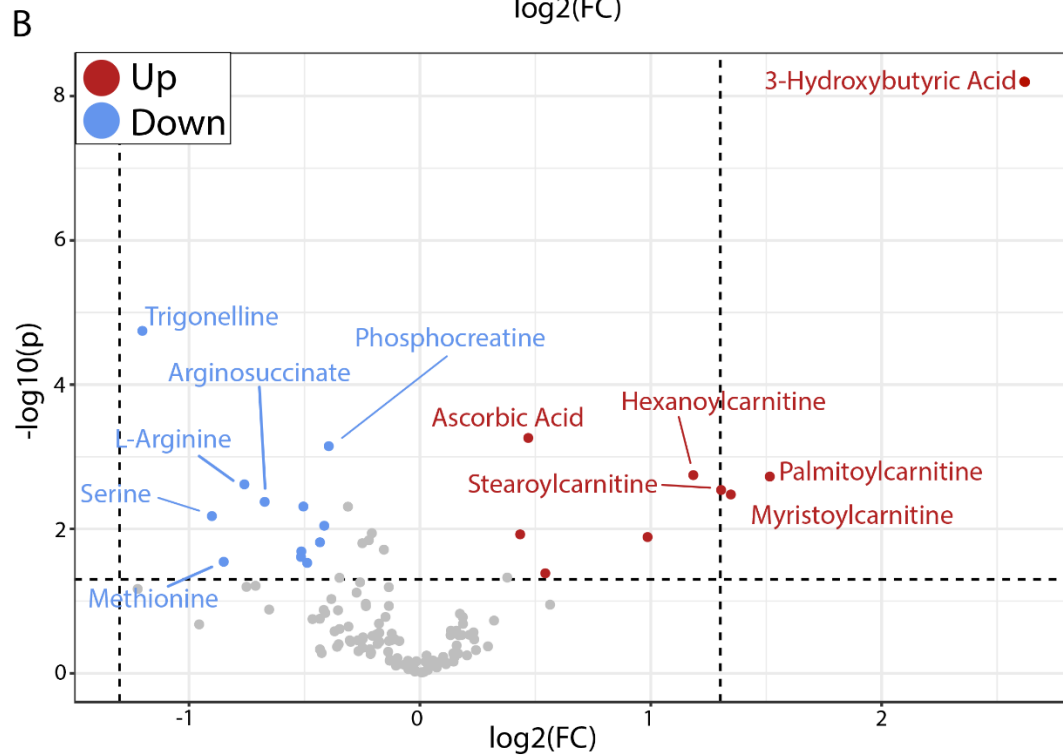

**Supplemental Figure S1. (A)** Volcano plots of retinal metabolites from fed vs. fasted male mice. **(B)** Volcano plots of retinal metabolites from fed vs. fasted female mice.

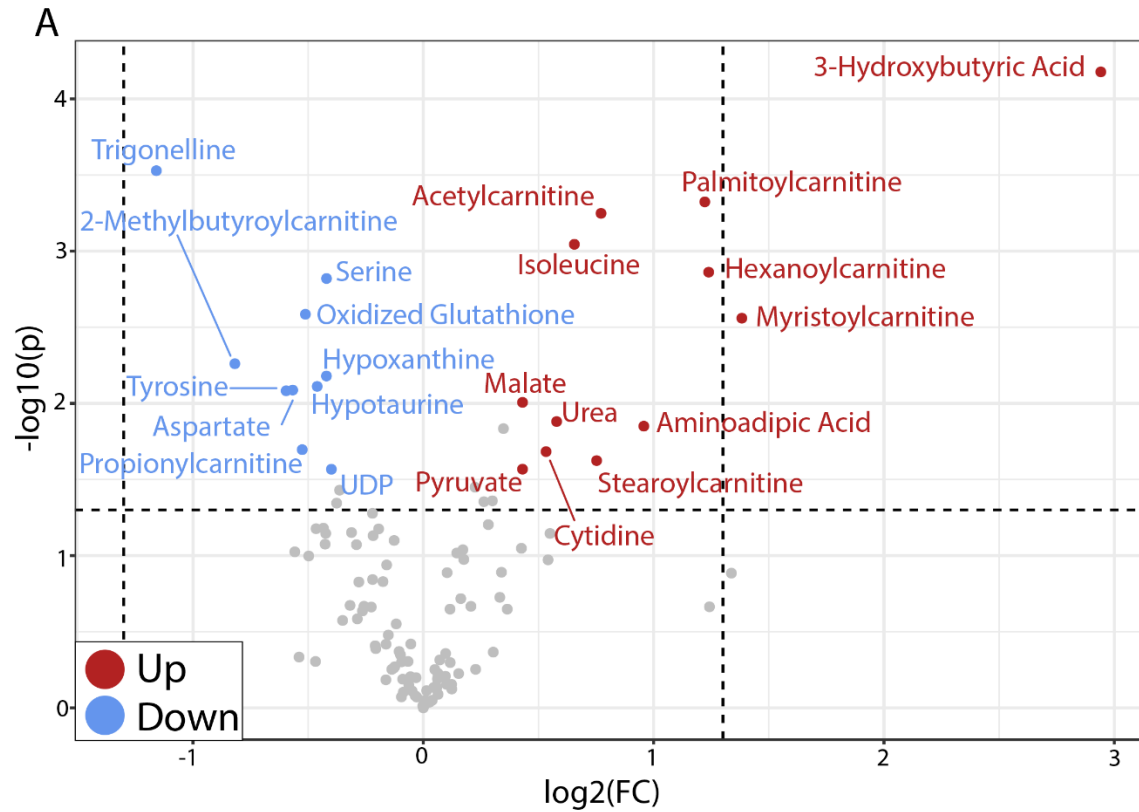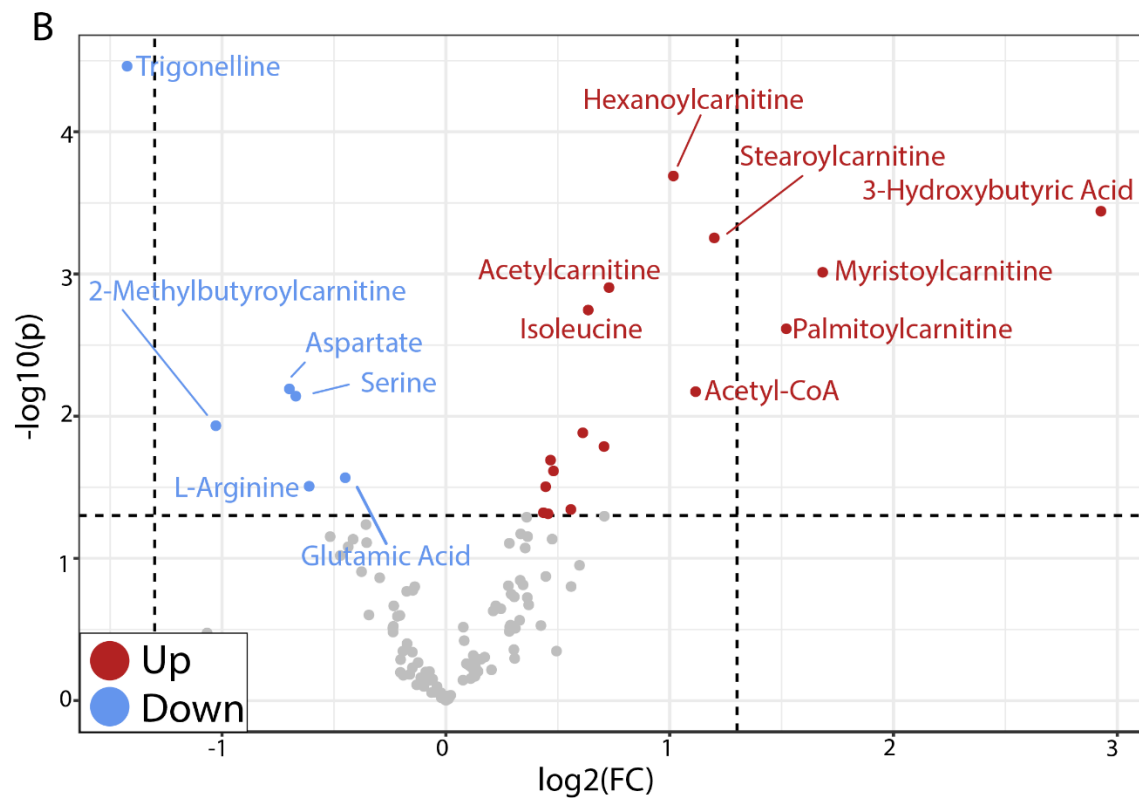

**Supplemental Figure S2.** (A) Volcano plots of RPE metabolites from fed vs. fasted male mice. (B) Volcano plots of RPE metabolites from fed and fasted male mice.

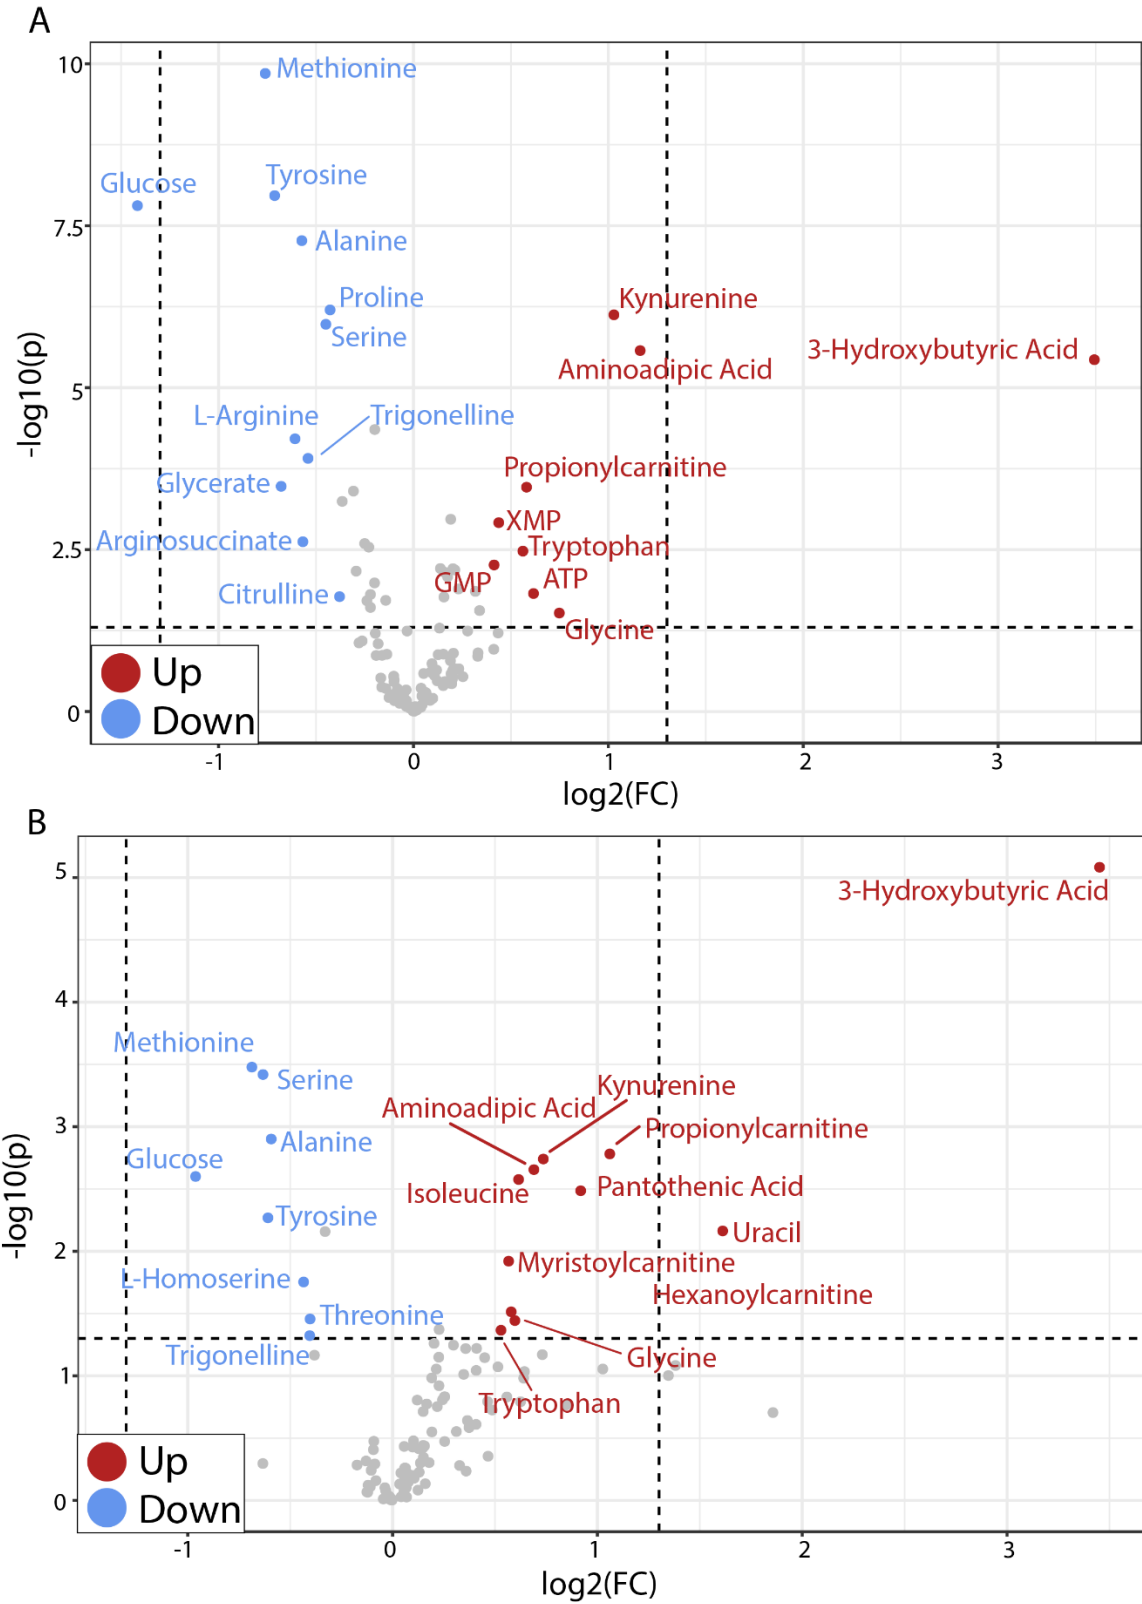

**Supplemental Figure S3. (A)** Volcano plots of lens metabolites from fed vs. fasted male mice. **(B)** Volcano plots of lens metabolites from fed and fasted male mice.

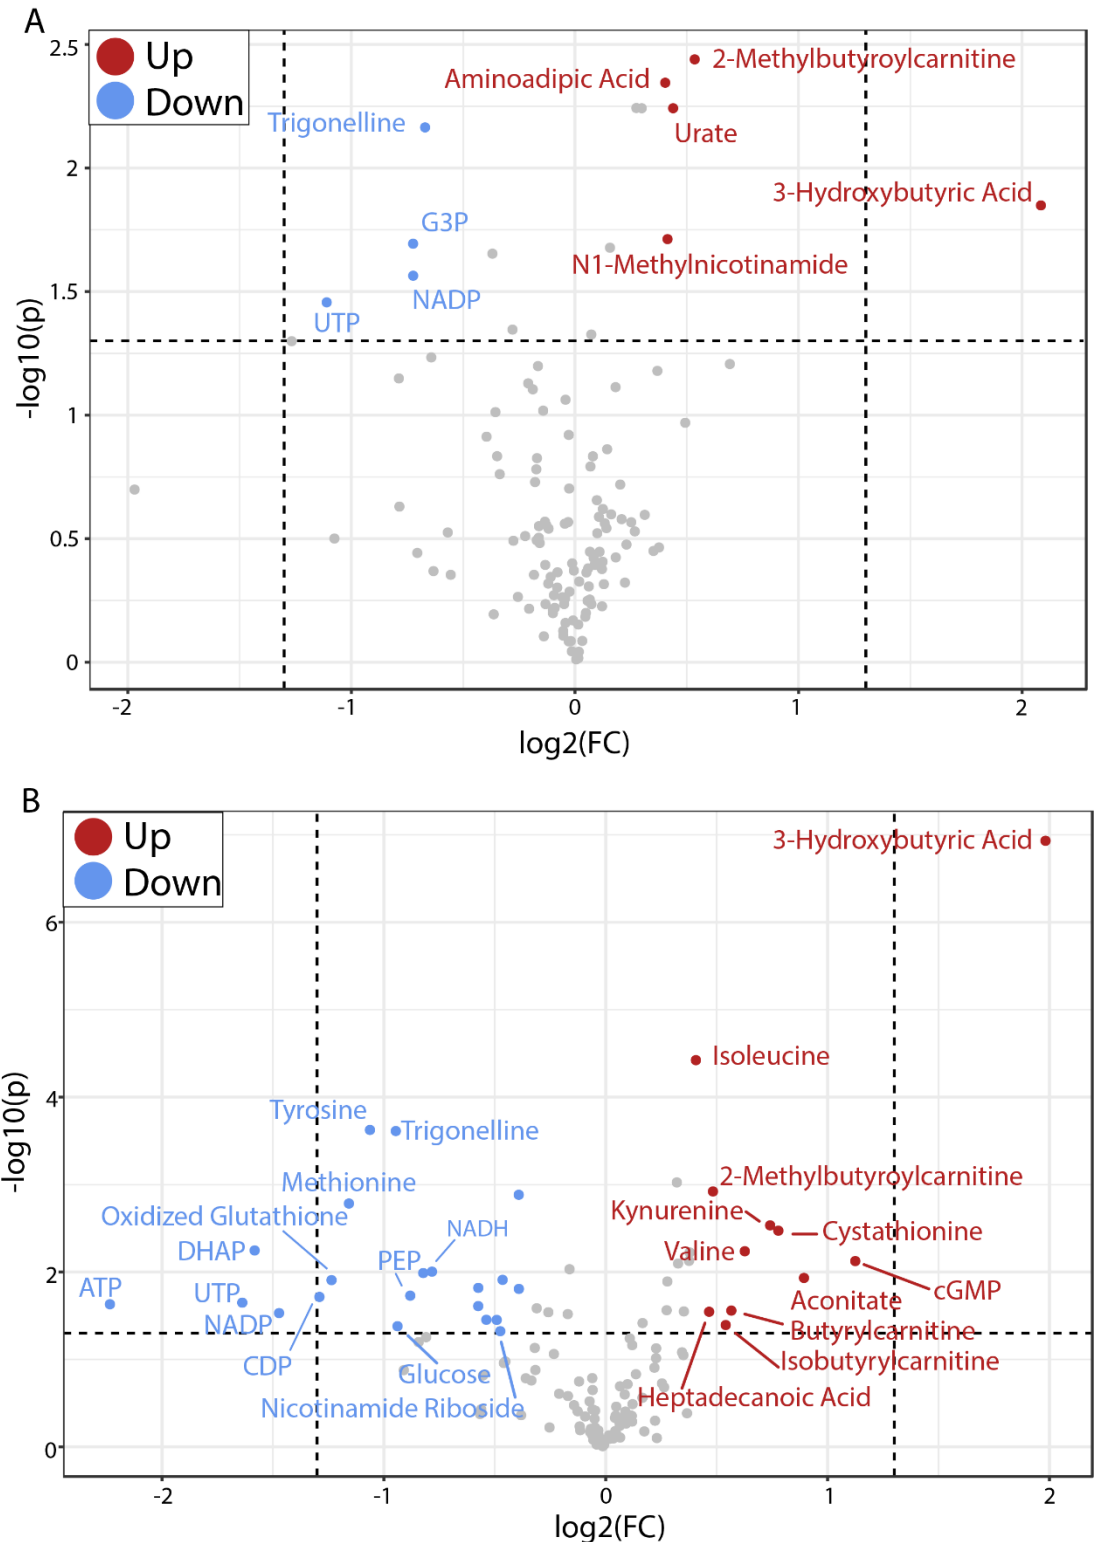

**Supplemental Figure S4.** (A) Volcano plots of brain metabolites from fed vs. fasted male mice. (B) Volcano plots of brain metabolites from fed and fasted male mice.

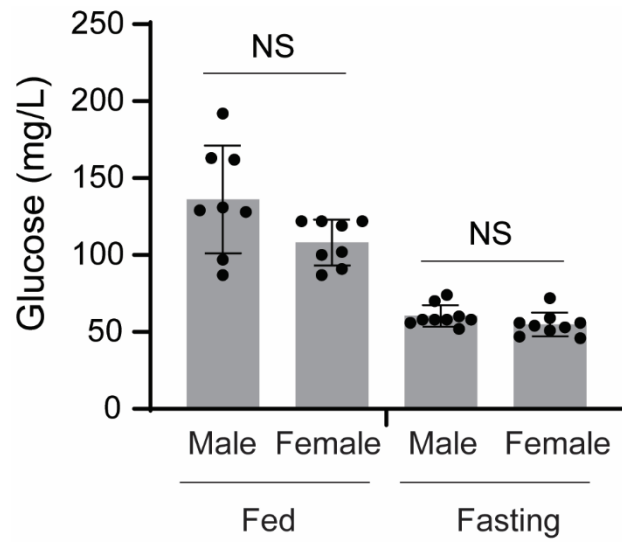

**Supplemental Figure S5.** Plasma glucose levels in fed and fasted mice. N=5 \*P<0.05. Glucose levels were measured via tail bleeding using a glucometer (Contour blood glucose meter 9545C).

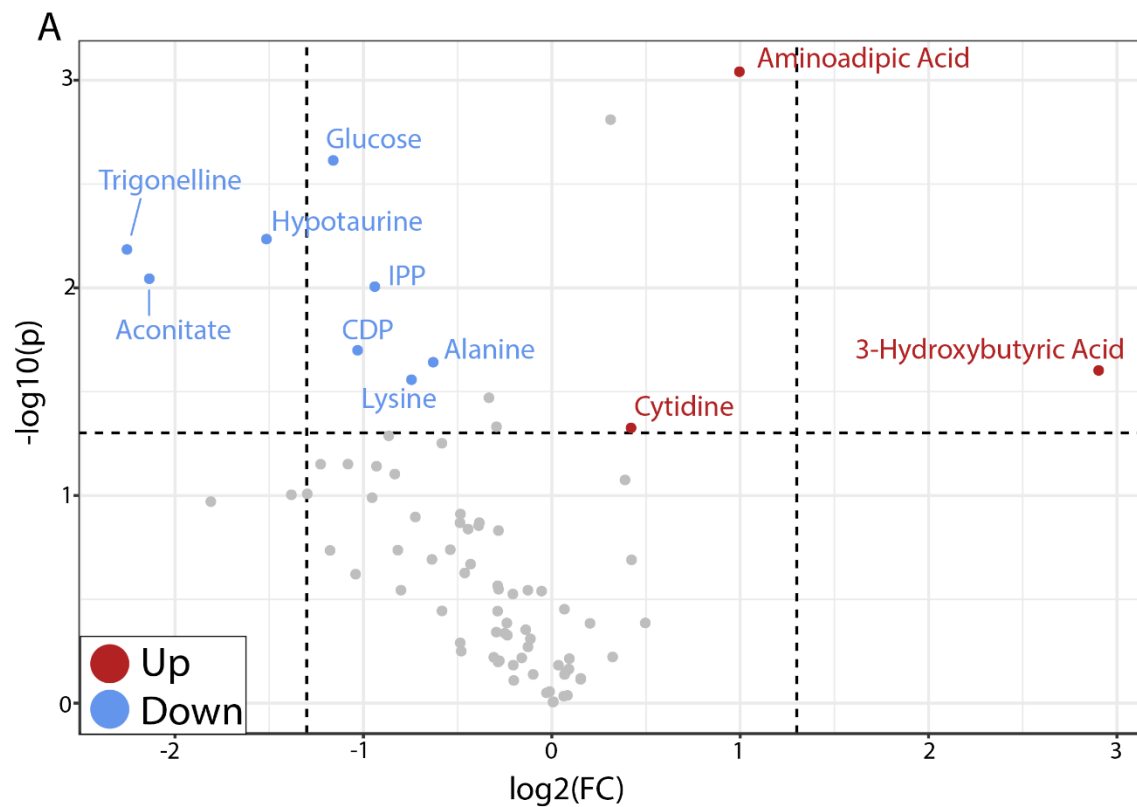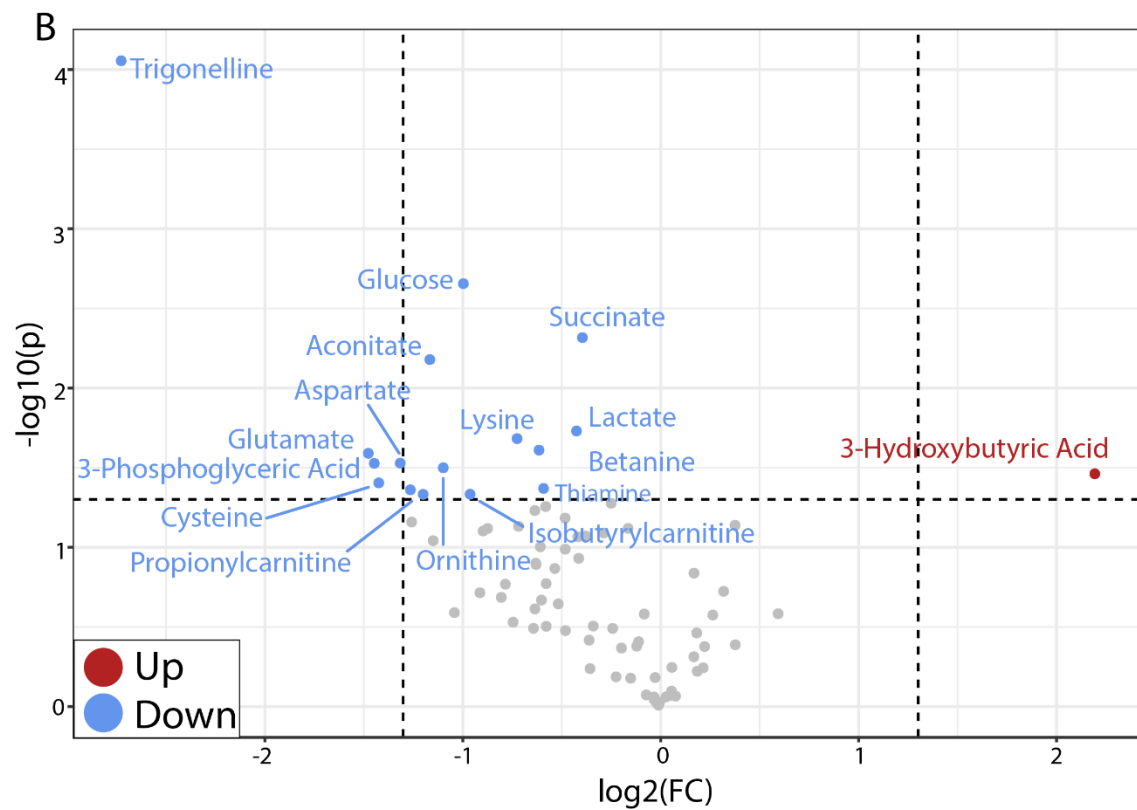

**Supplemental Figure S6 (A)** Volcano plots of plasma metabolites from fed vs. fasted male mice. **(B)** Volcano plots of plasma metabolites from fed and fasted male mice.

**Supplemental Table S1.** The lists of measured metabolites and their parameters in mass spectrometry.

| <b>Metabolite</b>        | <b>Platform</b> | <b>Pathway</b>                         | <b>CAS ID</b> |
|--------------------------|-----------------|----------------------------------------|---------------|
| 3-Hydroxybutyric acid    | GCMS            | Lipid/Ketone bodies                    | 300-85-6      |
| 3-Phosphoglyceric acid   | GCMS            | Glycolysis                             | 80731-10-8    |
| a-Ketoglutarate          | GCMS            | TCA Cycle                              | 328-50-7      |
| Asparagene               | GCMS            | Amino Acid                             | 70-47-3       |
| Beta-Alanine             | GCMS            | Amino acid                             | 107-95-9      |
| Biotin                   | GCMS            | Vitamins                               | 58-85-5       |
| Cholesterol              | GCMS            | Lipid                                  | 57-88-5       |
| Citrate                  | GCMS            | TCA Cycle                              | 77-92-9       |
| Cysteine                 | GCMS            | Amino Acid                             | 56-89-3       |
| Cystine                  | GCMS            | Amino Acid                             | 56-89-3       |
| DHAP                     | GCMS            | Glycolysis                             | 57-04-5       |
| Fumarate                 | GCMS            | TCA Cycle                              | 110-17-8      |
| Glycerate                | GCMS            | Glycolysis                             | 14028-62-7    |
| Isocitrate               | GCMS            | TCA Cycle                              | 1637-73-6     |
| Isoleucine               | GCMS            | Amino Acid                             | 73-32-5       |
| L-Histidine              | GCMS            | Amino Acid                             | 332-80-9      |
| Malate                   | GCMS            | TCA Cycle                              | 6915-15-7     |
| Palmitate                | GCMS            | Lipid metabolism/Fatty Acids           | 57-10-3       |
| PEP                      | GCMS            | Glycolysis                             | 138-08-9      |
| Pyroglutamic acid        | GCMS            | Amino Acid                             | 98-79-3       |
| Pyruvate                 | GCMS            | Glycolysis                             | 113-24-6      |
| Stearic acid             | GCMS            | Lipid metabolism/Fatty Acid            | 57-11-4       |
| Taurine                  | GCMS            | Amino Acid                             | 107-35-7      |
| Tryptophan               | GCMS            | Amino Acid                             | 73-22-3       |
| Uracil                   | GCMS            | Nucleotide/Pyrimidine metabolism       | 66-22-8       |
| Urea                     | GCMS            | Urea Cycle                             | 57-13-6       |
| 1-Methyladenosine        | LCMS            | Nucleotide/Purine metabolism           | 15763-06-1    |
| 2-Methylbutyrylcarnitine | LCMS            | AcylCarnitine/Amino acid metabolism    | 31023-25-3    |
| 3-Aminoisobutanoic acid  | LCMS            | Nucleotide/pyrimidine (thymine)        | 144-90-1      |
| 4-Hydroxyproline         | LCMS            | Amino Acid metabolism/Proline/Arginine | 51-35-4       |
| AcetylCarnitine          | LCMS            | Lipid metabolism                       | 14992-62-2    |
| AcetylCholine            | LCMS            | Lipid/phospholipid,                    | 51-84-3       |
| Acetyl-CoA               | LCMS            | TCA Cycle/Fatty acid metabolism        | 72-89-9       |
| Acetylglutamic acid      | LCMS            | Amino Acid metabolism/Proline/Arginine | 1188-37-0     |
| Aconitate                | LCMS            | TCA Cycle                              | 499-12-7      |
| Adenine                  | LCMS            | Nucleotide/Purine metabolism           | 73-24-5       |
| Adenosine                | LCMS            | Nucleotide/Purine metabolism           | 58-61-7       |
| ADP                      | LCMS            | Nucleotide/Purine metabolism           | 58-64-0       |
| AICAR                    | LCMS            | Nucleotide/Purine metabolism           | 3031-94-5     |
| Alanine                  | LCMS            | Amino Acid                             | 56-41-7       |



|                         |      |                                        |             |
|-------------------------|------|----------------------------------------|-------------|
| Amino adipic acid       | LCMS | Amino Acid metabolism/Lysine           | 542-32-5    |
| AMP                     | LCMS | Nucleotide                             | 61-19-8     |
| Arginosuccinate         | LCMS | Urea Cycle                             | 2387-71-5   |
| Ascorbic acid           | LCMS | Ascorbate and aldarate metabolism      | 50-81-7     |
| Aspartic acid           | LCMS | Amino Acid                             | 56-84-8     |
| ATP                     | LCMS | Nucleotide                             | 987-65-5    |
| Betaine                 | LCMS | Amino Acid/gly,ser, thr metabolism     | 590-46-5    |
| Butyrylcarnitine        | LCMS | Lipid metabolism/Fatty Acid metabolism | 25576-40-3  |
| cAMP                    | LCMS | Nucleotide/Purine metabolism           | 60-92-4     |
| Carnitine               | LCMS | Amino Acid metabolism/lys              | 541-15-1    |
| Carnosine               | LCMS | Amino Acids/Histidine                  | 305-84-0    |
| CDP                     | LCMS | Nucleotide/Pyrimidine metabolism       | 63-38-7     |
| cGMP                    | LCMS | Nucleotide/Purine metabolism           | 7665-99-8   |
| Choline                 | LCMS | Lipid metabolism                       | 62-49-7     |
| cis-Aconitic acid       | LCMS | TCA Cycle                              | 499-12-7    |
| Citrulline              | LCMS | Urea Cycle                             | 372-75-8    |
| CoA                     | LCMS | TCA Cycle/Fatty acid metabolism        | 55672-92-9  |
| Creatine                | LCMS | Amino Acids/Arg, gly                   | 57-00-1     |
| Creatinine              | LCMS | Amino Acids/Arg, gly                   | 60-27-5     |
| Cystathionine           | LCMS | Amino Acids/cys                        | 56-88-2     |
| Cytidine                | LCMS | Nucleotide                             | 65-46-3     |
|                         |      |                                        | 103404-90-6 |
| D-2-hydroxyglutarate    | LCMS | TCA cycle                              | 6           |
| D-Ribulose 5-phosphate  | LCMS | Glycolysis/PPP                         | 551-85-9    |
| Erythritol              | LCMS | Sugar                                  | 149-32-6    |
| FAD                     | LCMS | Nucleotide                             | 146-14-5    |
| G3P                     | LCMS | Glycolysis                             | 142-10-9    |
| Gamma-Aminobutyric acid | LCMS | Amino Acid metabolism/Ala, Glu, Asp    | 56-12-2     |
| GDP                     | LCMS | Nucleotide/Purine metabolism           | 146-91-8    |
| Glucose                 | LCMS | Glycolysis/sugar                       | 492-62-6    |
| Glucose 1-phosphate     | LCMS | Glycolysis                             | 59-56-3     |
| Glucose 6-phosphate     | LCMS | Glycolysis/PPP                         | 56-73-5     |
| Glutamate               | LCMS | Amino Acid                             | 56-86-0     |
| Glutamine               | LCMS | Amino Acid                             | 56-85-9     |
| Glutathione             | LCMS | Amino acid metabolism                  | 70-18-8     |
| Glycine                 | LCMS | Amino Acid                             | 56-40-6     |
| GMP                     | LCMS | Nucleotide/Purine metabolism           | 85-32-5     |
| Guanine                 | LCMS | Nucleotide/Purine metabolism           | 73-40-5     |
| Guanosine               | LCMS | Nucleotide                             | 118-00-3    |
| Heptadecanoic acid      | LCMS | Lipid metabolism/Fatty Acid metabolism | 506-12-7    |
| Hexanoylcarnitine       | LCMS | Acylcarnitines/Fatty Acid metabolism   | 22671-29-0  |
| Histamine               | LCMS | Amino acid metabolism                  | 51-45-6     |
| Hypotaurine             | LCMS | Taurine metabolism                     | 300-84-5    |
| Hypoxanthine            | LCMS | Nucleotide/Purine metabolism           | 68-94-0     |

|                          |      |                                         |                          |
|--------------------------|------|-----------------------------------------|--------------------------|
| IMP                      | LCMS | Nucleotide/Purine metabolism            | 131-99-7                 |
| Inosine                  | LCMS | Nucleotide/Purine metabolism            | 58-63-9                  |
| IPP                      | LCMS | mevalonate pathway                      | 18687-43-9               |
| Isobutyrylcarnitine      | LCMS | Lipid metabolism/Fatty Acid metabolism  | 25518-49-4               |
| Kynurenine               | LCMS | Amino Acid metabolism/Trp               | 343-65-7                 |
| Lactate                  | LCMS | Glycolysis                              | 50-21-5                  |
| L-Arginine               | LCMS | Amino Acid/Urea cycle                   | 74-79-3                  |
| L-Asparagine             | LCMS | Amino Acid/ AA metabolism/Ala, Glu, Asp | 70-47-3                  |
| Leucine                  | LCMS | Amino Acid                              | 61-90-5                  |
| L-Homoserine             | LCMS | Amino Acid/Thr, Met, Asp                | 1927-25-9                |
| Lysine                   | LCMS | Amino Acid                              | 56-87-1                  |
| Methionine               | LCMS | Amino Acid                              | 63-68-3                  |
| myo-Inositol             | LCMS | sugar                                   | 87-89-8                  |
| Myristoylcarnitine       | LCMS | Lipid metabolism/Fatty Acid metabolism  | 25597-07-3               |
| N1-Methylnicotinamide    | LCMS | NAD Metabolism                          | 3106-60-3                |
| N-Acetyl-L-aspartic acid | LCMS | Amino Acid metabolism/Ala, Glu, Asp     | 997-55-7                 |
| NAD                      | LCMS | Nicotinate and nicotinamide metabolism  | 53-84-9                  |
| NADH                     | LCMS | Nicotinate and nicotinamide metabolism  | 58-68-4                  |
| NADP                     | LCMS | Nicotinate and nicotinamide metabolism  | 53-59-8                  |
| NADPH                    | LCMS | Nicotinate and nicotinamide metabolism  | 2646-71-1                |
| Niacinamide              | LCMS | Nicotinate and nicotinamide metabolism  | 98-92-0                  |
| Nicotinamide riboside    | LCMS | Nicotinate and nicotinamide metabolism  | 2181-04-6                |
| Ornithine                | LCMS | Amino acid/Urea cycle                   | 70-26-8                  |
| Oxalic acid              | LCMS | Glyoxylate and dicarboxylate metabolism | 144-62-7                 |
| Oxidized Glutathione     | LCMS | Amino acid metabolism                   | 13081-14-6               |
| Palmitoylcarnitine       | LCMS | Acylcarnitines/Fatty Acid metabolism    | 1985-18-8<br>188174-64-3 |
| Palmitoyl-CoA            | LCMS | Lipid metabolism/Fatty Acid metabolism  | 3                        |
| Pantothenic acid         | LCMS | Vitamin/CoA                             | 137-08-6                 |
| Phenylalanine            | LCMS | Amino Acid                              | 63-91-2                  |
| Phosphocreatine          | LCMS | Amino Acid/pro and arginine             | 19333-65-4               |
| Proline                  | LCMS | Amino Acid                              | 4298-08-2                |
| Propionylcarnitine       | LCMS | Acylcarnitine/Fatty Acid metabolism     | 17298-37-2               |
| Riboflavin               | LCMS | Vitamins                                | 83-88-5                  |
| SAM                      | LCMS | Amino Acid/pro and arginine             | 86867-01-8               |
| Serine                   | LCMS | Amino Acid                              | 56-45-1                  |
| Stearoylcarnitine        | LCMS | Acylcarnitines/Fatty Acid metabolism    | 25597-09-5               |
| Succinate                | LCMS | TCA Cycle                               | 110-15-6                 |
| Thiamine                 | LCMS | Vitamins                                | 59-43-8                  |
| Threonine                | LCMS | Amino Acid                              | 72-19-5                  |
| Trigonelline             | LCMS | Nicotinate and nicotinamide metabolism  | 535-83-1                 |
| Tyrosine                 | LCMS | Amino Acid                              | 60-18-4                  |
| UDP                      | LCMS | Nucleotide/Pyrimidine metabolism        | 58-98-0                  |
| UDP-Glucosamine          | LCMS | Nucleotide sugar                        | 17479-04-8               |

|                                |      |                              |          |
|--------------------------------|------|------------------------------|----------|
| Urate                          | LCMS | Nucleotide/Purine metabolism | 69-93-2  |
| Uridine diphosphate<br>glucose | LCMS | Nucleotide sugar             | 133-89-1 |
| UTP                            | LCMS | Nucleotide/pyrimidine        | 63-39-8  |
| Valine                         | LCMS | Amino Acid                   | 72-18-4  |
| Xanthine                       | LCMS | Nucleotide                   | 69-89-6  |
| Xanthosine                     | LCMS | Nucleotide/Purine metabolism | 146-80-5 |
| XMP                            | LCMS | Nucleotide/Purine metabolism | 523-98-8 |

---

**Supplemental Table S2.** Sex different retinal metabolites in different metabolic pathways in the fed state by Volcano plots.

| Metabolite            | Pathway                                | FC     | log2(FC) | P Value    | -log10(p) |
|-----------------------|----------------------------------------|--------|----------|------------|-----------|
| Propionylcarnitine    | Acylcarnitine/Fatty Acid metabolism    | 3.6136 | 1.8534   | 1.32E-05   | 4.8787    |
| Proline               | Amino Acid                             | 1.343  | 0.42551  | 2.82E-05   | 4.5498    |
| Cytidine              | Nucleotide                             | 1.8893 | 0.91789  | 8.47E-05   | 4.0723    |
| Butyrylcarnitine      | Lipid metabolism/Fatty Acid metabolism | 1.6889 | 0.75604  | 8.87E-05   | 4.0521    |
| Isobutyrylcarnitine   | Lipid metabolism/Fatty Acid metabolism | 1.6111 | 0.68803  | 0.00010577 | 3.9756    |
| GMP                   | Nucleotide/Purine metabolism           | 1.6883 | 0.75558  | 0.00019268 | 3.7152    |
| 3-Hydroxybutyric acid | Lipid/Ketone bodies                    | 5.0645 | 2.3404   | 0.00020165 | 3.6954    |
| Palmitoylcarnitine    | Acylcarnitines/Fatty Acid metabolism   | 2.3445 | 1.2293   | 0.00026731 | 3.573     |
| Hexanoylcarnitine     | Acylcarnitines/Fatty Acid metabolism   | 3.3436 | 1.7414   | 0.00029345 | 3.5325    |
| Leucine               | Amino Acid                             | 1.4752 | 0.56094  | 0.00034592 | 3.461     |
| XMP                   | Nucleotide/Purine metabolism           | 1.4717 | 0.55746  | 0.00039787 | 3.4003    |
| Stearoylcarnitine     | Acylcarnitines/Fatty Acid metabolism   | 2.1546 | 1.1074   | 0.00081669 | 3.0879    |
| Serine                | Amino Acid                             | 0.6272 | -0.67296 | 0.00095775 | 3.0187    |
| Phenylalanine         | Amino Acid                             | 1.3499 | 0.43286  | 0.0010143  | 2.9938    |
| Aconitate             | TCA Cycle                              | 1.4528 | 0.53887  | 0.0011904  | 2.9243    |
| IMP                   | Nucleotide/Purine metabolism           | 1.4803 | 0.56588  | 0.0015179  | 2.8187    |
| Pantothenic acid      | Vitamin/CoA                            | 1.7378 | 0.79725  | 0.0015518  | 2.8092    |
| NADP                  | Nicotinate and nicotinamide metabolism | 2.0291 | 1.0209   | 0.002006   | 2.6977    |
| Trigonelline          | Nicotinate and nicotinamide metabolism | 0.727  | -0.46005 | 0.0024475  | 2.6113    |
| Oxidized glutathione  | Amino acid metabolism                  | 1.6918 | 0.75859  | 0.0026826  | 2.5714    |
| CDP                   | Nucleotide/Pyrimidine metabolism       | 1.8668 | 0.90055  | 0.0029955  | 2.5235    |
| N1-Methylnicotinamide | NAD Metabolism                         | 1.6302 | 0.70508  | 0.0030881  | 2.5103    |
| NADPH                 | Nicotinate and nicotinamide metabolism | 1.8407 | 0.88023  | 0.0040566  | 2.3918    |
| Pyroglutamic acid     | Amino Acid                             | 1.6497 | 0.7222   | 0.0060116  | 2.221     |
| Tryptophan            | Amino Acid                             | 1.5738 | 0.65422  | 0.0064967  | 2.1873    |
| GDP                   | Nucleotide/Purine metabolism           | 1.8341 | 0.87507  | 0.0078247  | 2.1065    |
| G3P                   | Glycolysis                             | 1.322  | 0.40268  | 0.0078706  | 2.104     |
| Cysteine              | Amino Acid                             | 0.6018 | -0.73268 | 0.008608   | 2.0651    |

|                       |                                        |        |          |           |        |
|-----------------------|----------------------------------------|--------|----------|-----------|--------|
| UDP                   | Nucleotide/Pyrimidine metabolism       | 1.4385 | 0.52452  | 0.0088668 | 2.0522 |
| Myristoylcarnitine    | Lipid metabolism/Fatty Acid metabolism | 2.0372 | 1.0266   | 0.010333  | 1.9858 |
| Xanthine              | Nucleotide                             | 1.5758 | 0.65605  | 0.010804  | 1.9664 |
| Tyrosine              | Amino Acid                             | 0.6433 | -0.63648 | 0.01205   | 1.919  |
| Nicotinamide Riboside | Nicotinate and nicotinamide metabolism | 1.5466 | 0.62907  | 0.016849  | 1.7734 |
| D-2-hydroxyglutarate  | TCA cycle                              | 1.3012 | 0.37988  | 0.018187  | 1.7402 |
| UTP                   | Nucleotide/pyrimidine                  | 1.7443 | 0.80261  | 0.018249  | 1.7388 |
| ADP                   | Nucleotide/Purine metabolism           | 1.4149 | 0.50071  | 0.019531  | 1.7093 |
| Methionine            | Amino Acid                             | 0.6916 | -0.53208 | 0.019937  | 1.7003 |
| FAD                   | Nucleotide                             | 1.541  | 0.62388  | 0.020585  | 1.6864 |
| Palmitoyl-CoA         | Lipid metabolism/Fatty Acid metabolism | 1.9143 | 0.93683  | 0.021527  | 1.667  |
| Lysine                | Amino Acid                             | 0.7653 | -0.38599 | 0.030136  | 1.5209 |
| Palmitate             | Lipid metabolism/Fatty Acids           | 0.5363 | -0.89884 | 0.036594  | 1.4366 |
| Stearic acid          | Lipid metabolism/Fatty Acid            | 0.6938 | -0.5274  | 0.038629  | 1.4131 |
| Kynurenine            | Amino Acid metabolism/Trp              | 1.6981 | 0.76389  | 0.039618  | 1.4021 |
| Guanine               | Nucleotide/Purine metabolism           | 1.6336 | 0.70809  | 0.049879  | 1.3021 |

**Supplemental Table S3.** Changed retinal metabolites in different metabolic pathways in fed vs. fasted male mice by Volcano plots.

| Metabolite            | Pathway                                | FC      | log2(FC) | P Value    | -log10(p) |
|-----------------------|----------------------------------------|---------|----------|------------|-----------|
| Propionylcarnitine    | Acylcarnitine/Fatty Acid metabolism    | 3.6136  | 1.8534   | 1.32E-05   | 4.8787    |
| Proline               | Amino Acid                             | 1.343   | 0.42551  | 2.82E-05   | 4.5498    |
| Cytidine              | Nucleotide                             | 1.8893  | 0.91789  | 8.47E-05   | 4.0723    |
| Butyrylcarnitine      | Lipid metabolism/Fatty Acid metabolism | 1.6889  | 0.75604  | 8.87E-05   | 4.0521    |
| Isobutyrylcarnitine   | Lipid metabolism/Fatty Acid metabolism | 1.6111  | 0.68803  | 0.00010577 | 3.9756    |
| GMP                   | Nucleotide/Purine metabolism           | 1.6883  | 0.75558  | 0.00019268 | 3.7152    |
| 3-Hydroxybutyric acid | Lipid/Ketone bodies                    | 5.0645  | 2.3404   | 0.00020165 | 3.6954    |
| Palmitoylcarnitine    | Acylcarnitines/Fatty Acid metabolism   | 2.3445  | 1.2293   | 0.00026731 | 3.573     |
| Hexanoylcarnitine     | Acylcarnitines/Fatty Acid metabolism   | 3.3436  | 1.7414   | 0.00029345 | 3.5325    |
| Leucine               | Amino Acid                             | 1.4752  | 0.56094  | 0.00034592 | 3.461     |
| XMP                   | Nucleotide/Purine metabolism           | 1.4717  | 0.55746  | 0.00039787 | 3.4003    |
| Stearoylcarnitine     | Acylcarnitines/Fatty Acid metabolism   | 2.1546  | 1.1074   | 0.00081669 | 3.0879    |
| Serine                | Amino Acid                             | 0.62722 | -0.67296 | 0.00095775 | 3.0187    |
| Phenylalanine         | Amino Acid                             | 1.3499  | 0.43286  | 0.0010143  | 2.9938    |
| Aconitate             | TCA Cycle                              | 1.4528  | 0.53887  | 0.0011904  | 2.9243    |
| IMP                   | Nucleotide/Purine metabolism           | 1.4803  | 0.56588  | 0.0015179  | 2.8187    |
| Pantothenic acid      | Vitamin/CoA                            | 1.7378  | 0.79725  | 0.0015518  | 2.8092    |
| NADP                  | Nicotinate and nicotinamide metabolism | 2.0291  | 1.0209   | 0.002006   | 2.6977    |
| Trigonelline          | Nicotinate and nicotinamide metabolism | 0.72696 | -0.46005 | 0.0024475  | 2.6113    |
| Oxidized glutathione  | Amino acid metabolism                  | 1.6918  | 0.75859  | 0.0026826  | 2.5714    |
| CDP                   | Nucleotide/Pyrimidine metabolism       | 1.8668  | 0.90055  | 0.0029955  | 2.5235    |
| N1-Methylnicotinamide | NAD Metabolism                         | 1.6302  | 0.70508  | 0.0030881  | 2.5103    |
| NADPH                 | Nicotinate and nicotinamide metabolism | 1.8407  | 0.88023  | 0.0040566  | 2.3918    |
| Pyroglutamic acid     | Amino Acid                             | 1.6497  | 0.7222   | 0.0060116  | 2.221     |
| Tryptophan            | Amino Acid                             | 1.5738  | 0.65422  | 0.0064967  | 2.1873    |
| GDP                   | Nucleotide/Purine metabolism           | 1.8341  | 0.87507  | 0.0078247  | 2.1065    |
| G3P                   | Glycolysis                             | 1.322   | 0.40268  | 0.0078706  | 2.104     |
| Cysteine              | Amino Acid                             | 0.60178 | -0.73268 | 0.008608   | 2.0651    |

|                       |                                        |         |          |           |        |
|-----------------------|----------------------------------------|---------|----------|-----------|--------|
| UDP                   | Nucleotide/Pyrimidine metabolism       | 1.4385  | 0.52452  | 0.0088668 | 2.0522 |
| Myristoylcarnitine    | Lipid metabolism/Fatty Acid metabolism | 2.0372  | 1.0266   | 0.010333  | 1.9858 |
| Xanthine              | Nucleotide                             | 1.5758  | 0.65605  | 0.010804  | 1.9664 |
| Tyrosine              | Amino Acid                             | 0.64328 | -0.63648 | 0.01205   | 1.919  |
| Nicotinamide Riboside | Nicotinate and nicotinamide metabolism | 1.5466  | 0.62907  | 0.016849  | 1.7734 |
| D-2-hydroxyglutarate  | TCA cycle                              | 1.3012  | 0.37988  | 0.018187  | 1.7402 |
| UTP                   | Nucleotide/pyrimidine                  | 1.7443  | 0.80261  | 0.018249  | 1.7388 |
| ADP                   | Nucleotide/Purine metabolism           | 1.4149  | 0.50071  | 0.019531  | 1.7093 |
| Methionine            | Amino Acid                             | 0.69156 | -0.53208 | 0.019937  | 1.7003 |
| FAD                   | Nucleotide                             | 1.541   | 0.62388  | 0.020585  | 1.6864 |
| Palmitoyl-CoA         | Lipid metabolism/Fatty Acid metabolism | 1.9143  | 0.93683  | 0.021527  | 1.667  |
| Lysine                | Amino Acid                             | 0.76526 | -0.38599 | 0.030136  | 1.5209 |
| Palmitate             | Lipid metabolism/Fatty Acids           | 0.53632 | -0.89884 | 0.036594  | 1.4366 |
| Stearic acid          | Lipid metabolism/Fatty Acid            | 0.6938  | -0.5274  | 0.038629  | 1.4131 |
| Kynurenine            | Amino Acid metabolism/Trp              | 1.6981  | 0.76389  | 0.039618  | 1.4021 |
| Guanine               | Nucleotide/Purine metabolism           | 1.6336  | 0.70809  | 0.049879  | 1.3021 |

**Supplemental Table S4.** Changed retinal metabolites in different metabolic pathways in fed vs. fasted female mice by Volcano plots.

| <b>Metabolite</b>     | <b>Pathway</b>                         | <b>FC</b> | <b>log2(FC)</b> | <b>P Value</b> | <b>-log10(p)</b> |
|-----------------------|----------------------------------------|-----------|-----------------|----------------|------------------|
| 3-Hydroxybutyric acid | Lipid/Ketone bodies                    | 6.1512    | 2.6209          | 6.38E-09       | 8.1955           |
| Trigonelline          | Nicotinate and nicotinamide metabolism | 0.43467   | -1.202          | 1.80E-05       | 4.7458           |
| Ascorbic acid         | Ascorbate and aldarate metabolism      | 1.3844    | 0.46922         | 0.00054799     | 3.2612           |
| Phosphocreatine       | Amino Acid/Pro and Arg                 | 0.76063   | -0.39473        | 0.00071183     | 3.1476           |
| Hexanoylcarnitine     | Acylcarnitines/Fatty Acid metabolism   | 2.2721    | 1.184           | 0.0017945      | 2.7461           |
| Palmitoylcarnitine    | Acylcarnitines/Fatty Acid metabolism   | 2.8586    | 1.5153          | 0.0018785      | 2.7262           |
| L-Arginine            | Amino Acid/Urea cycle                  | 0.5904    | -0.76024        | 0.0024084      | 2.6183           |
| Stearoylcarnitine     | Acylcarnitines/Fatty Acid metabolism   | 2.4699    | 1.3044          | 0.0028844      | 2.5399           |
| Myristoylcarnitine    | Lipid metabolism/Fatty Acid metabolism | 2.5431    | 1.3466          | 0.0033302      | 2.4775           |
| Arginosuccinate       | Urea Cycle                             | 0.62751   | -0.67229        | 0.0042092      | 2.3758           |
| Aspartic acid         | Amino Acid                             | 0.70485   | -0.50461        | 0.0048872      | 2.3109           |
| Serine                | Amino Acid                             | 0.53553   | -0.90095        | 0.0066322      | 2.1783           |
| Alanine               | Amino Acid                             | 0.75038   | -0.41431        | 0.0090249      | 2.0446           |
| Pantothenic acid      | Vitamin/CoA                            | 1.3511    | 0.43416         | 0.01189        | 1.9248           |
| Propionylcarnitine    | Acylcarnitine/Fatty Acid metabolism    | 1.9806    | 0.98592         | 0.012951       | 1.8877           |
| Carnitine             | Amino Acid metabolism/Lys              | 0.74072   | -0.43301        | 0.015299       | 1.8153           |
| Amino adipic acid     | Amino Acid metabolism/Ly               | 0.70052   | -0.51351        | 0.020473       | 1.6888           |
| Threonine             | Amino Acid                             | 0.69972   | -0.51514        | 0.024436       | 1.612            |
| Methionine            | Amino Acid                             | 0.55488   | -0.84975        | 0.028497       | 1.5452           |
| L-Homoserine          | Amino Acid/Thr, Met, Asp               | 0.71292   | -0.48818        | 0.029511       | 1.53             |
| Kynurenine            | Amino Acid metabolism/Trp              | 1.457     | 0.54301         | 0.041153       | 1.3856           |



**Supplemental Table S5.** Changed RPE metabolites in different metabolic pathways in the fed state by Volcano plots.

| <b>Metabolite</b>          | <b>Pathway</b>                            | <b>FC</b> | <b>log2(FC)</b> | <b>P Value</b> | <b>-log10(p)</b> |
|----------------------------|-------------------------------------------|-----------|-----------------|----------------|------------------|
| Succinate                  | TCA Cycle                                 | 0.28256   | -1.8233         | 5.76E-06       | 5.2395           |
| Beta-Alanine               | Amino Acid                                | 0.50734   | -0.97897        | 0.0001627      | 3.7887           |
| Taurine                    | Amino Acid                                | 0.61686   | -0.69698        | 0.0026604      | 2.5751           |
| 4-Hydroxyproline           | Amino Acid<br>metabolism/Pro, Arg         | 0.61081   | -0.71121        | 0.0028086      | 2.5515           |
| Acetyl-CoA                 | TCA Cycle/Fatty acid<br>metabolism        | 0.58175   | -0.78152        | 0.0046309      | 2.3343           |
| AcetylCholine              | Lipid/phospholipid,                       | 0.30612   | -1.7078         | 0.0075427      | 2.1225           |
| Hypotaurine                | Taurine metabolism                        | 0.51827   | -0.94823        | 0.0078318      | 2.1061           |
| Hypoxanthine               | Nucleotide/Purine<br>metabolism           | 0.71865   | -0.47664        | 0.011852       | 1.9262           |
| ATP                        | Nucleotide                                | 0.50062   | -0.9982         | 0.012307       | 1.9098           |
| NAD                        | Nicotinate and<br>nicotinamide metabolism | 0.69381   | -0.52739        | 0.015164       | 1.8192           |
| Citrate                    | TCA Cycle                                 | 0.70483   | -0.50466        | 0.018697       | 1.7282           |
| Creatinine                 | Amino Acids/Arg, gly                      | 0.56817   | -0.8156         | 0.022438       | 1.649            |
| Pantothenic acid           | Vitamin/CoA                               | 1.4528    | 0.53888         | 0.026994       | 1.5687           |
| Histamine                  | Amino acid metabolism                     | 0.66588   | -0.58666        | 0.028587       | 1.5438           |
| Guanine                    | Nucleotide/Purine<br>metabolism           | 0.66912   | -0.57967        | 0.031756       | 1.4982           |
| Palmitoylcarnitine         | Acylcarnitines/Fatty Acid<br>metabolism   | 0.72661   | -0.46075        | 0.032625       | 1.4865           |
| Propionylcarnitine         | Acylcarnitine/Fatty Acid<br>metabolism    | 0.72521   | -0.46353        | 0.034629       | 1.4606           |
| D-Ribulose 5-<br>phosphate | Glycolysis/PPP                            | 0.67922   | -0.55806        | 0.040824       | 1.3891           |
| Carnosine                  | Amino Acids/Histidine                     | 0.57018   | -0.81052        | 0.048639       | 1.313            |

**Supplemental Table S6.** Changed RPE metabolites in different metabolic pathways in fed vs. fasted male mice by Volcano plots.

| <b>Metabolite</b>        | <b>Pathway</b>                         | <b>FC</b> | <b>log2(FC)</b> | <b>P Value</b> | <b>-log10(p)</b> |
|--------------------------|----------------------------------------|-----------|-----------------|----------------|------------------|
| 3-Hydroxybutyric acid    | Lipid/Ketone bodies                    | 7.6816    | 2.9414          | 6.65E-05       | 4.1774           |
| Trigonelline             | Nicotinate and nicotinamide metabolism | 0.44784   | -1.1589         | 0.0002962      | 3.5284           |
| Palmitoylcarnitine       | Acylcarnitines/Fatty Acid metabolism   | 2.333     | 1.2222          | 0.0004746      | 3.3237           |
| AcetylCarnitine          | Lipid/phospholipid                     | 1.7073    | 0.7717          | 0.0005647      | 3.2482           |
| Isoleucine               | Amino Acid                             | 1.5756    | 0.65586         | 0.000902       | 3.0448           |
| Hexanoylcarnitine        | Acylcarnitines/Fatty Acid metabolism   | 2.3603    | 1.239           | 0.0013745      | 2.8618           |
| Serine                   | Amino Acid                             | 0.74735   | -0.42013        | 0.0015128      | 2.8202           |
| Oxidized glutathione     | Amino acid metabolism                  | 0.70137   | -0.51175        | 0.002598       | 2.5854           |
| Myristoylcarnitine       | Lipid metabolism/Fatty Acid metabolism | 2.608     | 1.383           | 0.0027566      | 2.5596           |
| 2-Methylbutyrylcarnitine | AcylCarnitine/Amino acid metabolism    | 0.56719   | -0.8181         | 0.005489       | 2.2605           |
| Hypoxanthine             | Nucleotide/Purine metabolism           | 0.74717   | -0.42049        | 0.0066116      | 2.1797           |
| Hypotaurine              | Taurine metabolism                     | 0.72661   | -0.46076        | 0.0077346      | 2.1116           |
| Aspartic acid            | Amino Acid                             | 0.675     | -0.56704        | 0.0081778      | 2.0874           |
| Tyrosine                 | Amino Acid                             | 0.66191   | -0.5953         | 0.0082668      | 2.0827           |
| Malate                   | TCA Cycle                              | 1.348     | 0.43078         | 0.0098496      | 2.0066           |
| Urea                     | Urea Cycle                             | 1.4937    | 0.57887         | 0.013164       | 1.8806           |
| Amino adipic acid        | Amino Acid metabolism/Lysine           | 1.9418    | 0.95738         | 0.014115       | 1.8503           |
| Propionylcarnitine       | Acylcarnitine/Fatty Acid metabolism    | 0.69463   | -0.52568        | 0.020135       | 1.696            |
| Cytidine                 | Nucleotide                             | 1.4469    | 0.53297         | 0.020744       | 1.6831           |
| Stearoylcarnitine        | Acylcarnitines/Fatty Acid metabolism   | 1.6847    | 0.75249         | 0.023764       | 1.6241           |
| Pyruvate                 | Glycolysis                             | 1.3479    | 0.43076         | 0.027049       | 1.5678           |
| UDP                      | Nucleotide/Pyrimidine metabolism       | 0.75831   | -0.39913        | 0.027087       | 1.5672           |

**Supplemental Table S7.** Changed RPE metabolites in different metabolic pathways in fed vs. fasted female mice by Volcano plots.

| Metabolite               | Pathway                                | FC      | log2(FC) | P Value   | -log10(p) |
|--------------------------|----------------------------------------|---------|----------|-----------|-----------|
| Trigonelline             | Nicotinate and nicotinamide metabolism | 0.37264 | -1.4241  | 3.46E-05  | 4.4613    |
| Hexanoylcarnitine        | Acylcarnitines/Fatty Acid metabolism   | 2.023   | 1.0165   | 0.0002045 | 3.6892    |
| 3-Hydroxybutyric acid    | Lipid/Ketone bodies                    | 7.6035  | 2.9267   | 0.0003618 | 3.4415    |
| Stearoylcarnitine        | Acylcarnitines/Fatty Acid metabolism   | 2.2963  | 1.1993   | 0.0005578 | 3.2535    |
| Myristoylcarnitine       | Lipid metabolism/Fatty Acid metabolism | 3.2121  | 1.6835   | 0.0009731 | 3.0119    |
| AcetylCarnitine          | Lipid metabolism                       | 1.6574  | 0.72896  | 0.0012461 | 2.9044    |
| Isoleucine               | Amino Acid                             | 1.554   | 0.63598  | 0.0017928 | 2.7465    |
| Palmitoylcarnitine       | Acylcarnitines/Fatty Acid metabolism   | 2.8697  | 1.5209   | 0.002428  | 2.6147    |
| Aspartic acid            | Amino Acid                             | 0.61598 | -0.69905 | 0.0064289 | 2.1919    |
| Acetyl-CoA               | TCA Cycle/Fatty acid metabolism        | 2.1671  | 1.1158   | 0.006723  | 2.1724    |
| Serine                   | Amino Acid                             | 0.62834 | -0.67038 | 0.0072295 | 2.1409    |
| 2-Methylbutyrylcarnitine | AcylCarnitine/Amino acid metabolism    | 0.49054 | -1.0276  | 0.011665  | 1.9331    |
| Isocitrate               | TCA Cycle                              | 1.5283  | 0.6119   | 0.013093  | 1.883     |
| Citrate                  | TCA Cycle                              | 1.632   | 0.70663  | 0.016346  | 1.7866    |
| Malate                   | TCA Cycle                              | 1.3829  | 0.46766  | 0.02038   | 1.6908    |
| Creatinine               | Amino Acids/Arg, gly                   | 1.3956  | 0.4809   | 0.024285  | 1.6147    |
| Glutamic acid            | Amino Acid                             | 0.73231 | -0.44947 | 0.027103  | 1.567     |
| L-Arginine               | Amino Acid/Urea cycle                  | 0.65482 | -0.61083 | 0.03111   | 1.5071    |
| Phosphocreatine          | Amino Acid/pro and arginine            | 1.3621  | 0.44585  | 0.031335  | 1.504     |
| Carnosine                | Amino Acids/Histidine                  | 1.4727  | 0.55848  | 0.045295  | 1.3439    |
| Pantothenic acid         | Vitamin/CoA                            | 1.3527  | 0.43579  | 0.047715  | 1.3213    |
| Cytidine                 | Nucleotide                             | 1.3723  | 0.45659  | 0.048568  | 1.3136    |

**Supplemental Table S8.** Changed lens metabolites in different metabolic pathways in the fed state by Volcano plots.

| Metabolite               | Pathway                                | FC      | log2(FC) | P Value   | -log10(p) |
|--------------------------|----------------------------------------|---------|----------|-----------|-----------|
| 4-Hydroxyproline         | Amino Acid metabolism/Pro, Arg         | 0.42469 | -1.2355  | 1.69E-07  | 6.7712    |
| Hypotaurine              | Taurine metabolism                     | 0.5417  | -0.88443 | 1.61E-05  | 4.7944    |
| Ascorbic acid            | Ascorbate and aldarate metabolism      | 0.12633 | -2.9847  | 3.80E-05  | 4.4204    |
| Glutathione              | Amino acid metabolism                  | 0.25927 | -1.9475  | 8.57E-05  | 4.0668    |
| UDP-Glucosamine          | Nucleotide sugar                       | 0.4611  | -1.1169  | 0.000487  | 3.3125    |
| Urate                    | Nucleotide/Purine metabolism           | 0.55914 | -0.83872 | 0.0006381 | 3.1951    |
| IMP                      | Nucleotide/Purine metabolism           | 0.68324 | -0.54953 | 0.0007074 | 3.1503    |
| Propionylcarnitine       | Acylcarnitine/Fatty Acid metabolism    | 0.5577  | -0.84245 | 0.000992  | 3.0035    |
| NADH                     | Nicotinate and nicotinamide metabolism | 0.4921  | -1.023   | 0.001009  | 2.9961    |
| AMP                      | Nucleotide                             | 0.67795 | -0.56074 | 0.0011322 | 2.9461    |
| UDP                      | Nucleotide/ Pyrimidine metabolism      | 0.33224 | -1.5897  | 0.0017076 | 2.7676    |
| CDP                      | Nucleotide/ Pyrimidine metabolism      | 0.3354  | -1.576   | 0.001726  | 2.7629    |
| Kynurenine               | Amino Acid metabolism/Trp              | 1.5     | 0.58496  | 0.0021433 | 2.6689    |
| D-Ribulose 5-phosphate   | Glycolysis/PPP                         | 0.697   | -0.52077 | 0.0023475 | 2.6294    |
| ADP                      | Nucleotide/Purine metabolism           | 0.41638 | -1.264   | 0.0025508 | 2.5933    |
| GDP                      | Nucleotide/Purine metabolism           | 0.37867 | -1.401   | 0.0041162 | 2.3855    |
| IPP                      | mevalonate pathway                     | 0.67784 | -0.56097 | 0.0046131 | 2.336     |
| Butyrylcarnitine         | Lipid metabolism/Fatty Acid metabolism | 0.68725 | -0.54109 | 0.0051714 | 2.2864    |
| N-Acetyl-L-aspartic acid | Amino Acid metabolism/Ala, Glu, Asp    | 0.65407 | -0.61249 | 0.0053861 | 2.2687    |
| Isobutyrylcarnitine      | Lipid metabolism/Fatty Acid metabolism | 0.70134 | -0.51182 | 0.0063538 | 2.197     |
| Cystine                  | Amino Acid                             | 1.6243  | 0.69978  | 0.0066549 | 2.1769    |
| Hexanoylcarnitine        | Acylcarnitines/Fatty Acid metabolism   | 0.6721  | -0.57325 | 0.0069427 | 2.1585    |
| Palmitoylcarnitine       | Acylcarnitines/Fatty Acid metabolism   | 0.73883 | -0.43669 | 0.0073081 | 2.1362    |

|                         |                                        |         |          |           |        |
|-------------------------|----------------------------------------|---------|----------|-----------|--------|
| Erythritol              | Sugar                                  | 0.76338 | -0.38952 | 0.0092814 | 2.0324 |
| 2-Methylbutyrocarnitine | AcylCarnitine/Amino acid metabolism    | 0.72039 | -0.47316 | 0.0099399 | 2.0026 |
| Phosphocreatine         | Amino Acid/pro and arginine            | 0.49136 | -1.0251  | 0.010897  | 1.9627 |
| Myristoylcarnitine      | Lipid metabolism/Fatty Acid metabolism | 0.61277 | -0.70658 | 0.012593  | 1.8999 |
| Glucose                 | Glycolysis/sugar                       | 1.4773  | 0.56298  | 0.012673  | 1.8971 |
| Acetylglutamic acid     | Amino Acid metabolism/Proline/Arginine | 0.76847 | -0.37993 | 0.012866  | 1.8906 |
| Nicotinamide Riboside   | Nicotinate and nicotinamide metabolism | 0.66388 | -0.59102 | 0.013104  | 1.8826 |
| GMP                     | Nucleotide/Purine metabolism           | 0.629   | -0.66887 | 0.013846  | 1.8587 |
| Glucose 6-phosphate     | Glycolysis/PPP                         | 0.71809 | -0.47776 | 0.020177  | 1.6951 |
| AcetylCholine           | Lipid/phospholipid, ligand             | 0.61312 | -0.70577 | 0.024482  | 1.6111 |
| Adenine                 | Nucleotide/Purine metabolism           | 2.2215  | 1.1515   | 0.025506  | 1.5934 |
| Fumarate                | TCA Cycle                              | 0.62599 | -0.67578 | 0.025734  | 1.5895 |
| Arginosuccinate         | Urea Cycle                             | 0.67647 | -0.5639  | 0.028288  | 1.5484 |
| UTP                     | Nucleotide/pyrimidine                  | 0.48947 | -1.0307  | 0.03114   | 1.5067 |
| Aconitate               | TCA Cycle                              | 0.61004 | -0.71301 | 0.032692  | 1.4856 |
| Uracil                  | Nucleotide/ Pyrimidine metabolism      | 0.73613 | -0.44196 | 0.033105  | 1.4801 |
| Tryptophan              | Amino Acid                             | 1.3055  | 0.38462  | 0.036312  | 1.44   |
| Isocitrate              | TCA Cycle                              | 0.56684 | -0.81899 | 0.037813  | 1.4224 |
| Malate                  | TCA Cycle                              | 0.67148 | -0.57457 | 0.039126  | 1.4075 |
| Citrate                 | TCA Cycle                              | 0.6029  | -0.73002 | 0.041385  | 1.3832 |
| a-Ketoglutarate         | TCA Cycle                              | 0.60481 | -0.72544 | 0.042366  | 1.373  |
| 3-Phosphoglyceric acid  | Glycolysis                             | 0.55339 | -0.85364 | 0.048102  | 1.3178 |

**Supplemental Table S9.** Changed lens metabolites in different metabolic pathways in fed vs. fasted male mice by Volcano plots.

| <b>Metabolite</b>      | <b>Pathway</b>                         | <b>FC</b> | <b>log2(FC)</b> | <b>P Value</b> | <b>-log10(p)</b> |
|------------------------|----------------------------------------|-----------|-----------------|----------------|------------------|
| 4-Hydroxyproline       | Amino Acid metabolism/Proline/Arginine | 0.45368   | -1.1403         | 1.06E-07       | 6.9736           |
| NADH                   | Nicotinate and nicotinamide metabolism | 0.52409   | -0.9321         | 5.55E-07       | 6.2555           |
| ADP                    | Nucleotide/Purine metabolism           | 0.37578   | -1.412          | 6.89E-07       | 6.1619           |
| UDP                    | Nucleotide/Pyrimidine metabolism       | 0.29544   | -1.7591         | 3.26E-06       | 5.4863           |
| CDP                    | Nucleotide/Pyrimidine metabolism       | 0.26815   | -1.8989         | 3.86E-06       | 5.4129           |
| IMP                    | Nucleotide/Purine metabolism           | 0.70389   | -0.50658        | 6.97E-06       | 5.1568           |
| AMP                    | Nucleotide                             | 0.68836   | -0.53877        | 8.22E-06       | 5.0853           |
| Glutathione            | Amino acid metabolism                  | 0.28772   | -1.7973         | 1.61E-05       | 4.7922           |
| GDP                    | Nucleotide/Purine metabolism           | 0.3004    | -1.735          | 2.40E-05       | 4.6207           |
| Ascorbic acid          | Ascorbate and aldarate metabolism      | 0.13111   | -2.9312         | 3.13E-05       | 4.5041           |
| Hypotaurine            | Taurine metabolism                     | 0.6706    | -0.57648        | 6.82E-05       | 4.1663           |
| GMP                    | Nucleotide/Purine metabolism           | 0.64486   | -0.63293        | 9.42E-05       | 4.026            |
| ATP                    | Nucleotide                             | 0.40133   | -1.3171         | 0.00024        | 3.6194           |
| Adenine                | Nucleotide/Purine metabolism           | 2.2561    | 1.1739          | 0.00043        | 3.3668           |
| IPP                    | mevalonate pathway                     | 0.74224   | -0.43004        | 0.000651       | 3.1861           |
| Amino adipic acid      | Amino Acid metabolism/Lysine           | 0.63879   | -0.64658        | 0.000893       | 3.0492           |
| XMP                    | Nucleotide/Purine metabolism           | 0.6833    | -0.54941        | 0.001574       | 2.803            |
| Glucose                | Glycolysis/sugar                       | 2.0243    | 1.0174          | 0.00194        | 2.7122           |
| Nicotinamide riboside  | Nicotinate and nicotinamide metabolism | 0.71199   | -0.49007        | 0.002375       | 2.6244           |
| Pantothenic acid       | Vitamin/CoA                            | 1.5388    | 0.62182         | 0.003703       | 2.4314           |
| Thiamine               | Vitamins                               | 0.44959   | -1.1533         | 0.003934       | 2.4052           |
| Cystine                | Amino Acid                             | 2.3494    | 1.2323          | 0.004484       | 2.3484           |
| 3-Phosphoglyceric acid | Glycolysis                             | 0.61357   | -0.7047         | 0.009814       | 2.0082           |
| Glycerate              | Glycolysis                             | 2.0418    | 1.0298          | 0.015175       | 1.8189           |
| UTP                    | Nucleotide/pyrimidine                  | 0.5478    | -0.86828        | 0.015874       | 1.7993           |
| UDP-Glucosamine        | Nucleotide sugar                       | 0.72676   | -0.46045        | 0.016041       | 1.7948           |
| Uracil                 | Nucleotide/Pyrimidine metabolism       | 1.9515    | 0.96461         | 0.016134       | 1.7923           |
| NAD                    | Nicotinate and nicotinamide metabolism | 0.6555    | -0.60933        | 0.028197       | 1.5498           |

**Supplemental Table S10.** Changed lens metabolites in different metabolic pathways in fed vs. fasted female mice by Volcano plots.

| <b>Metabolite</b>     | <b>Pathway</b>                               | <b>FC</b> | <b>log2(FC)</b> | <b>P Value</b> | <b>-log10(p)</b> |
|-----------------------|----------------------------------------------|-----------|-----------------|----------------|------------------|
| Methionine            | Amino Acid                                   | 0.59031   | -0.76045        | 1.41E-10       | 9.8516           |
| Tyrosine              | Amino Acid                                   | 0.61037   | -0.71224        | 1.08E-08       | 7.9659           |
| Glucose               | Glycolysis/sugar                             | 0.3747    | -1.4162         | 1.55E-08       | 7.81             |
| Alanine               | Amino Acid                                   | 0.67223   | -0.57297        | 5.37E-08       | 7.2701           |
| Proline               | Amino Acid                                   | 0.74338   | -0.42782        | 6.30E-07       | 6.201            |
| Kynurenine            | Amino Acid<br>metabolism/Trp                 | 2.04      | 1.0286          | 7.50E-07       | 6.1249           |
| Serine                | Amino Acid                                   | 0.73233   | -0.44943        | 1.05E-06       | 5.9786           |
| Amino adipic acid     | Amino Acid<br>metabolism/Lysine              | 2.2399    | 1.1634          | 2.67E-06       | 5.5729           |
| 3-Hydroxybutyric acid | Lipid/Ketone bodies                          | 11.264    | 3.4937          | 3.70E-06       | 5.4319           |
| L-Arginine            | Amino Acid/Urea cycle                        | 0.65624   | -0.60771        | 6.15E-05       | 4.211            |
| Trigonelline          | Nicotinate and<br>nicotinamide<br>metabolism | 0.68732   | -0.54095        | 0.0001234      | 3.9088           |
| Glycerate             | Glycolysis                                   | 0.62468   | -0.6788         | 0.0003331      | 3.4774           |
| Propionylcarnitine    | Acylcarnitine/Fatty<br>Acid metabolism       | 1.4952    | 0.58031         | 0.0003437      | 3.4638           |
| XMP                   | Nucleotide/Purine<br>metabolism              | 1.3544    | 0.43763         | 0.001212       | 2.9165           |
| Arginosuccinate       | Urea Cycle                                   | 0.67479   | -0.56749        | 0.0023894      | 2.6217           |
| Tryptophan            | Amino Acid                                   | 1.4758    | 0.56152         | 0.0033357      | 2.4768           |
| GMP                   | Nucleotide/Purine<br>metabolism              | 1.3321    | 0.41369         | 0.0054533      | 2.2633           |
| ATP                   | Nucleotide                                   | 1.5326    | 0.61596         | 0.015059       | 1.8222           |
| Citrulline            | Urea Cycle                                   | 0.76887   | -0.37919        | 0.016817       | 1.7743           |
| Glycine               | Amino Acid                                   | 1.6799    | 0.7484          | 0.030133       | 1.521            |

**Supplemental Table S11.** Changed brain metabolites in different metabolic pathways in the fed state by Volcano plots.

| <b>Metabolite</b>      | <b>Pathway</b>                                                         | <b>FC</b> | <b>log2(FC)</b> | <b>P Value</b> | <b>-log10(p)</b> |
|------------------------|------------------------------------------------------------------------|-----------|-----------------|----------------|------------------|
| 3-Phosphoglyceric acid | Glycolysis                                                             | 1.6517    | 0.72392         | 0.017088       | 1.7673           |
| cAMP                   | Nucleotide/Purine metabolism                                           | 1.9955    | 0.99672         | 0.031295       | 1.5045           |
| Glucose                | Glycolysis/sugar                                                       | 2.1654    | 1.1147          | 0.028782       | 1.5409           |
| Glucose 1-phosphate    | Glycolysis                                                             | 1.3453    | 0.42793         | 0.01782        | 1.7491           |
| Glucose 6-phosphate    | Glycolysis/PPP                                                         | 1.4109    | 0.49657         | 0.024843       | 1.6048           |
| Glycerate              | Glycolysis                                                             | 2.4906    | 1.3165          | 0.021429       | 1.669            |
| Hypotaurine            | Taurine metabolism                                                     | 0.43133   | -1.2131         | 0.010304       | 1.987            |
| Hypoxanthine           | Nucleotide/Purine metabolism                                           | 0.68879   | -0.53787        | 0.001358       | 2.867            |
| Kynurenine             | Amino Acid metabolism/Trp<br>Nicotinate and nicotinamide<br>metabolism | 1.3636    | 0.44747         | 0.047157       | 1.3265           |
| NAD                    |                                                                        | 0.67971   | -0.55701        | 0.024357       | 1.6134           |
| Pantothenic acid       | Vitamin/CoA                                                            | 1.3712    | 0.45546         | 0.000156       | 3.8081           |
| PEP                    | Glycolysis                                                             | 1.4706    | 0.55639         | 0.018721       | 1.7277           |
| Thiamine               | Vitamins                                                               | 0.59737   | -0.74329        | 0.025238       | 1.5979           |
| Uracil                 | Nucleotide/Pyrimidine metabolism                                       | 0.74944   | -0.41611        | 0.011571       | 1.9366           |



**Supplemental Table S12.** Changed brain metabolites in different metabolic pathways in the fasted state by Volcano plots.

| <b>Metabolite</b>     | <b>Pathway</b>                         | <b>FC</b> | <b>log2(FC)</b> | <b>P Value</b> | <b>-log10(p)</b> |
|-----------------------|----------------------------------------|-----------|-----------------|----------------|------------------|
| Aconitate             | TCA Cycle                              | 1.8474    | 0.88546         | 0.023852       | 1.6225           |
| ADP                   | Nucleotide/Purine metabolism           | 0.7174    | -0.47915        | 0.049835       | 1.3025           |
| ATP                   | Nucleotide                             | 0.27504   | -1.8623         | 0.013567       | 1.8675           |
| cGMP                  | Nucleotide/Purine metabolism           | 2.0395    | 1.0282          | 0.023383       | 1.6311           |
| CoA                   | TCA Cycle/Fatty acid metabolism        | 0.4994    | -1.0017         | 0.040616       | 1.3913           |
| Cystathionine         | Amino Acids/cys                        | 1.6675    | 0.73766         | 0.006593       | 2.1809           |
| Hypotaurine           | Taurine metabolism                     | 0.45918   | -1.1229         | 0.049854       | 1.3023           |
| Methionine            | Amino Acid                             | 0.5614    | -0.83289        | 0.023608       | 1.6269           |
| NADP                  | Nicotinate and nicotinamide metabolism | 0.41096   | -1.2829         | 0.028343       | 1.5475           |
| Nicotinamide riboside | Nicotinate and nicotinamide metabolism | 0.68593   | -0.54387        | 0.045193       | 1.3449           |
| Oxidized glutathione  | Amino acid metabolism                  | 0.45622   | -1.1322         | 0.041305       | 1.384            |
| Pantothenic acid      | Vitamin/CoA                            | 1.474     | 0.55969         | 0.000472       | 3.3258           |
| SAM                   | Amino Acid/pro and arginine            | 0.4397    | -1.1854         | 0.007834       | 2.106            |
| Tyrosine              | Amino Acid                             | 0.5899    | -0.76147        | 0.004907       | 2.3092           |
| Xanthine              | Nucleotide                             | 0.66431   | -0.59007        | 0.007764       | 2.1099           |

**Supplemental Table S13.** Changed brain metabolites in different metabolic pathways in the fasted state by Volcano plots.

| <b>Metabolite</b>     | <b>Pathway</b>                         | <b>FC</b> | <b>log2(FC)</b> | <b>P Value</b> | <b>-log10(p)</b> |
|-----------------------|----------------------------------------|-----------|-----------------|----------------|------------------|
| Aconitate             | TCA Cycle                              | 1.8474    | 0.88546         | 0.023852       | 1.6225           |
| ADP                   | Nucleotide/Purine metabolism           | 0.7174    | -0.47915        | 0.049835       | 1.3025           |
| ATP                   | Nucleotide                             | 0.27504   | -1.8623         | 0.013567       | 1.8675           |
| cGMP                  | Nucleotide/Purine metabolism           | 2.0395    | 1.0282          | 0.023383       | 1.6311           |
| CoA                   | TCA Cycle/Fatty acid metabolism        | 0.4994    | -1.0017         | 0.040616       | 1.3913           |
| Cystathionine         | Amino Acids/cys                        | 1.6675    | 0.73766         | 0.006593       | 2.1809           |
| Hypotaurine           | Taurine metabolism                     | 0.45918   | -1.1229         | 0.049854       | 1.3023           |
| Methionine            | Amino Acid                             | 0.5614    | -0.83289        | 0.023608       | 1.6269           |
| NADP                  | Nicotinate and nicotinamide metabolism | 0.41096   | -1.2829         | 0.028343       | 1.5475           |
| Nicotinamide riboside | Nicotinate and nicotinamide metabolism | 0.68593   | -0.54387        | 0.045193       | 1.3449           |
| Oxidized glutathione  | Amino acid metabolism                  | 0.45622   | -1.1322         | 0.041305       | 1.384            |
| Pantothenic acid      | Vitamin/CoA                            | 1.474     | 0.55969         | 0.000472       | 3.3258           |
| SAM                   | Amino Acid/pro and arginine            | 0.4397    | -1.1854         | 0.007834       | 2.106            |
| Tyrosine              | Amino Acid                             | 0.5899    | -0.76147        | 0.004907       | 2.3092           |
| Xanthine              | Nucleotide                             | 0.66431   | -0.59007        | 0.007764       | 2.1099           |

**Supplemental Table S14.** Changed brain metabolites in different metabolic pathways in fed vs. fasted male mice by Volcano plots.

| <b>Metabolite</b>        | <b>Pathway</b>                         | <b>FC</b> | <b>log2(FC)</b> | <b>P Value</b> | <b>-log10(p)</b> |
|--------------------------|----------------------------------------|-----------|-----------------|----------------|------------------|
| 2-Methylbutyrylcarnitine | AcylCarnitine/Amino acid metabolism    | 1.4493    | 0.53532         | 0.0036333      | 2.4397           |
| Amino adipic acid        | Amino Acid metabolism/Lysine           | 1.3228    | 0.40356         | 0.0045172      | 2.3451           |
| Urate                    | Nucleotide/Purine metabolism           | 1.3555    | 0.43885         | 0.0057283      | 2.242            |
| Trigonelline             | Nicotinate and nicotinamide metabolism | 0.62827   | -0.67054        | 0.0068483      | 2.1644           |
| 3-Hydroxybutyric acid    | Lipid/Ketone bodies                    | 4.239     | 2.0837          | 0.014167       | 1.8487           |
| N1-Methylnicotinamide    | NAD Metabolism                         | 1.3323    | 0.41389         | 0.019394       | 1.7123           |
| G3P                      | Glycolysis                             | 0.60539   | -0.72407        | 0.020246       | 1.6937           |
| NADP                     | Nicotinate and nicotinamide metabolism | 0.60551   | -0.72378        | 0.027281       | 1.5641           |
| UTP                      | Nucleotide/pyrimidine                  | 0.46316   | -1.1104         | 0.034957       | 1.4565           |

**Supplemental Table S15.** Changed brain metabolites in different metabolic pathways in fed vs. fasted female mice by Volcano plots.

| Metabolite               | Pathway                                | FC      | log2(FC) | P Value   | -log10(p) |
|--------------------------|----------------------------------------|---------|----------|-----------|-----------|
| 3-Hydroxybutyric acid    | Lipid/Ketone bodies                    | 3.951   | 1.9822   | 1.17E-07  | 6.9321    |
| Isoleucine               | Amino Acid                             | 1.3255  | 0.40648  | 3.78E-05  | 4.4228    |
| Tyrosine                 | Amino Acid                             | 0.47872 | -1.0627  | 0.0002374 | 3.6246    |
| Trigonelline             | Nicotinate and nicotinamide metabolism | 0.51904 | -0.94609 | 0.0002443 | 3.6121    |
| 2-Methylbutyrylcarnitine | AcylCarnitine/Amino acid metabolism    | 1.398   | 0.48333  | 0.0011989 | 2.9212    |
| Lactate                  | Glycolysis                             | 0.76208 | -0.39199 | 0.0013095 | 2.8829    |
| Methionine               | Amino Acid                             | 0.44833 | -1.1574  | 0.0016478 | 2.7831    |
| Kynurenine               | Amino Acid metabolism/Trp              | 1.6713  | 0.74096  | 0.0029291 | 2.5333    |
| Cystathionine            | Amino Acids/cys                        | 1.7148  | 0.77801  | 0.0033708 | 2.4723    |
| DHAP                     | Glycolysis                             | 0.33395 | -1.5823  | 0.005669  | 2.2465    |
| Valine                   | Amino Acid                             | 1.5442  | 0.62683  | 0.0057904 | 2.2373    |
| cGMP                     | Nucleotide/Purine metabolism           | 2.1808  | 1.1248   | 0.0075014 | 2.1249    |
| NADH                     | Nicotinate and nicotinamide metabolism | 0.58112 | -0.7831  | 0.0099077 | 2.004     |
| PEP                      | Glycolysis                             | 0.56546 | -0.8225  | 0.010287  | 1.9877    |
| Aconitate                | TCA Cycle                              | 1.8577  | 0.89349  | 0.011694  | 1.932     |
| L-Arginine               | Amino Acid/Urea cycle                  | 0.72455 | -0.46484 | 0.012296  | 1.9102    |
| Oxidized glutathione     | Amino acid metabolism                  | 0.42457 | -1.2359  | 0.012386  | 1.9071    |
| Glucose 1-phosphate      | Glycolysis                             | 0.67156 | -0.57441 | 0.015201  | 1.8181    |
| Lysine                   | Amino Acid                             | 0.76242 | -0.39133 | 0.015609  | 1.8066    |
| 3-Phosphoglyceric acid   | Glycolysis                             | 0.54293 | -0.88117 | 0.018662  | 1.729     |
| CDP                      | Nucleotide/Pyrimidine metabolism       | 0.40885 | -1.2903  | 0.019274  | 1.715     |
| UTP                      | Nucleotide/pyrimidine                  | 0.32129 | -1.6381  | 0.022425  | 1.6493    |
| ATP                      | Nucleotide                             | 0.21247 | -2.2347  | 0.023385  | 1.6311    |
| ADP                      | Nucleotide/Purine metabolism           | 0.67141 | -0.57474 | 0.024548  | 1.61      |
| Butyrylcarnitine         | Lipid metabolism/Fatty Acid metabolism | 1.4806  | 0.56619  | 0.02763   | 1.5586    |
| Heptadecanoic acid       | Lipid metabolism/Fatty Acid metabolism | 1.3813  | 0.46602  | 0.028489  | 1.5453    |
| NADP                     | Nicotinate and nicotinamide metabolism | 0.36044 | -1.4722  | 0.029498  | 1.5302    |

|                       |                                              |         |          |          |        |
|-----------------------|----------------------------------------------|---------|----------|----------|--------|
| Nicotinamide Riboside | Nicotinate and<br>nicotinamide<br>metabolism | 0.68868 | -0.53809 | 0.03521  | 1.4533 |
| Ornithine             | Amino acid/Urea cyle                         | 0.7114  | -0.49127 | 0.035326 | 1.4519 |
| Isobutyrylcarnitine   | Lipid metabolism/Fatty<br>Acid metabolism    | 1.4548  | 0.54086  | 0.040416 | 1.3934 |
| Glucose               | Glycolysis/sugar                             | 0.52179 | -0.93845 | 0.041703 | 1.3798 |
| Glucose 6-phosphate   | Glycolysis/PPP                               | 0.71928 | -0.47538 | 0.047523 | 1.3231 |

---

**Supplemental Table S16.** Changed plasma metabolites in different metabolic pathways in fed vs. fasted male mice by Volcano plots.

| <b>Metabolite</b>     | <b>Pathway</b>                         | <b>FC</b> | <b>log<sub>2</sub>(FC)</b> | <b>P Value</b> | <b>-log<sub>10</sub>(p)</b> |
|-----------------------|----------------------------------------|-----------|----------------------------|----------------|-----------------------------|
| Amino adipic acid     | Amino Acid metabolism/Lysine           | 1.9943    | 0.99588                    | 0.0009097      | 3.0411                      |
| Glucose               | Glycolysis/sugar                       | 0.44742   | -1.1603                    | 0.0024337      | 2.6137                      |
| Hypotaurine           | Taurine metabolism                     | 0.35      | -1.5146                    | 0.0058226      | 2.2349                      |
| Trigonelline          | Nicotinate and nicotinamide metabolism | 0.20947   | -2.2552                    | 0.0065327      | 2.1849                      |
| Cis-aconitic acid     | TCA Cycle                              | 0.22744   | -2.1364                    | 0.0090333      | 2.0442                      |
| IPP                   | mevalonate pathway                     | 0.52134   | -0.93971                   | 0.009865       | 2.0059                      |
| CDP                   | Nucleotide/Pyrimidine metabolism       | 0.48945   | -1.0308                    | 0.019984       | 1.6993                      |
| Alanine               | Amino Acid                             | 0.64641   | -0.62948                   | 0.022802       | 1.642                       |
| 3-Hydroxybutyric acid | Lipid/Ketone bodies                    | 7.4789    | 2.9028                     | 0.024978       | 1.6024                      |
| Lysine                | Amino Acid                             | 0.59674   | -0.74482                   | 0.027688       | 1.5577                      |
| Cytidine              | Nucleotide                             | 1.3384    | 0.42056                    | 0.04725        | 1.3256                      |

**Supplemental Table S17.** Changed plasma metabolites in different metabolic pathways in fed vs. fasted male mice by Volcano plots.

| <b>Metabolite</b>      | <b>Pathway</b>                         | <b>FC</b> | <b>log2(FC)</b> | <b>P Value</b> | <b>-log10(p)</b> |
|------------------------|----------------------------------------|-----------|-----------------|----------------|------------------|
| Trigonelline           | Nicotinate and nicotinamide metabolism | 0.15111   | -2.7264         | 8.81E-05       | 4.0548           |
| Glucose                | Glycolysis/sugar                       | 0.50091   | -0.99739        | 0.002212       | 2.6552           |
| Succinate              | TCA Cycle                              | 0.76015   | -0.39564        | 0.0048231      | 2.3167           |
| Cis-aconitic acid      | TCA Cycle                              | 0.44545   | -1.1667         | 0.0066273      | 2.1787           |
| Lactate                | Glycolysis                             | 0.7446    | -0.42546        | 0.018613       | 1.7302           |
| Lysine                 | Amino Acid                             | 0.60461   | -0.72593        | 0.020769       | 1.6826           |
| Betaine                | Amino Acid/gly,ser, thr metabolism     | 0.65289   | -0.61509        | 0.024545       | 1.61             |
| Glutamate              | Amino Acid                             | 0.35916   | -1.4773         | 0.02569        | 1.5902           |
| Aspartate              | Amino Acid                             | 0.40158   | -1.3162         | 0.029626       | 1.5283           |
| 3-Phosphoglyceric acid | Glycolysis                             | 0.36667   | -1.4475         | 0.029718       | 1.527            |
| Butyrylcarnitine       | Lipid metabolism/Fatty Acid metabolism | 0.4669    | -1.0988         | 0.03168        | 1.4992           |
| 3-Hydroxybutyric acid  | Lipid/Ketone bodies                    | 4.5737    | 2.1934          | 0.034554       | 1.4615           |
| Cysteine               | Amino Acid                             | 0.3725    | -1.4247         | 0.039399       | 1.4045           |
| Thiamine               | Vitamins                               | 0.66342   | -0.59201        | 0.04269        | 1.3697           |
| Ornithine              | Amino acid/Urea cyle                   | 0.41608   | -1.2651         | 0.043573       | 1.3608           |
| Isobutyrylcarnitine    | Lipid metabolism/Fatty Acid metabolism | 0.51287   | -0.96333        | 0.04642        | 1.3333           |
| Propionylcarnitine     | Acylcarnitine/Fatty Acid metabolism    | 0.43513   | -1.2005         | 0.046526       | 1.3323           |
